# Supplementary material for: Impact of TNF -308 G>A (rs1800629) gene polymorphism in modulation of leprosy risk: a reappraise meta-analysis of 14 case–control studies
Source: PubMed Central journal article supplement (PMC5664359; doi:10.1042/bsr20170806), 2017-10-27
Supplement: BSR20170806_Supp1.pdf [file BSR20170806_Supp1.pdf]

### Funnel Plot of Standard Error by Log odds ratio

Study name

A vs. G

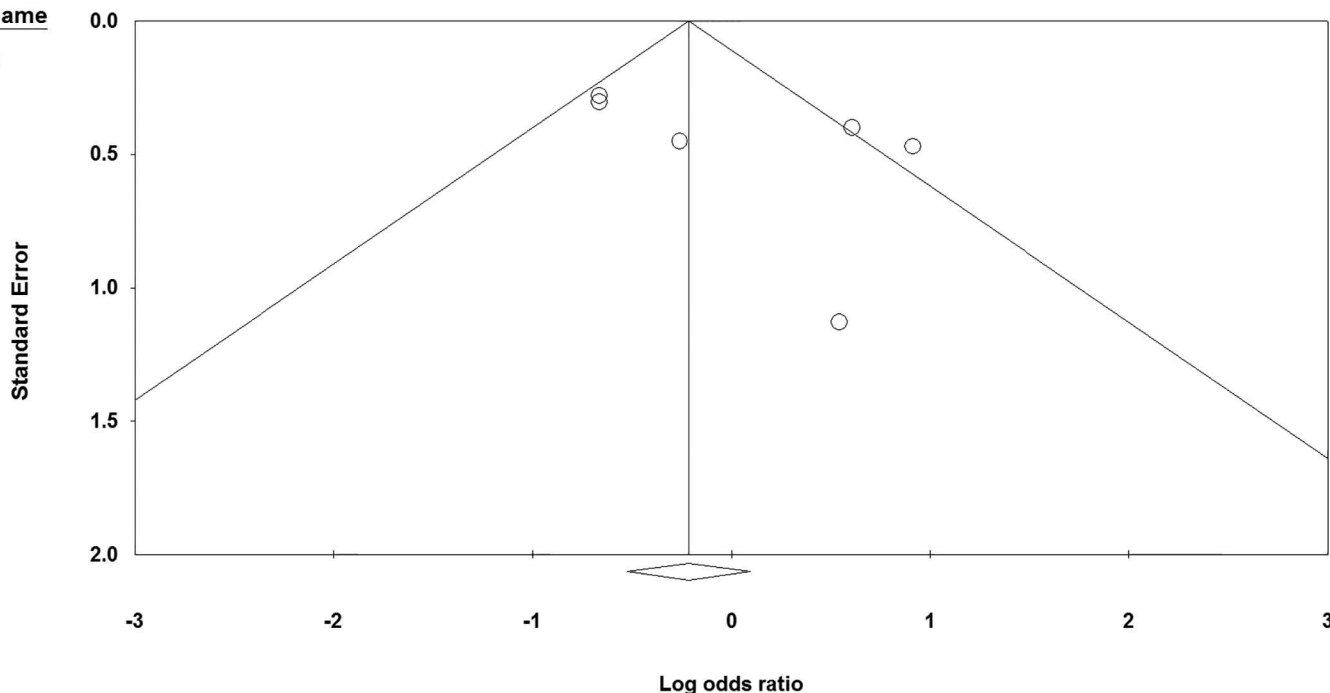

Study name

AA vs. GG

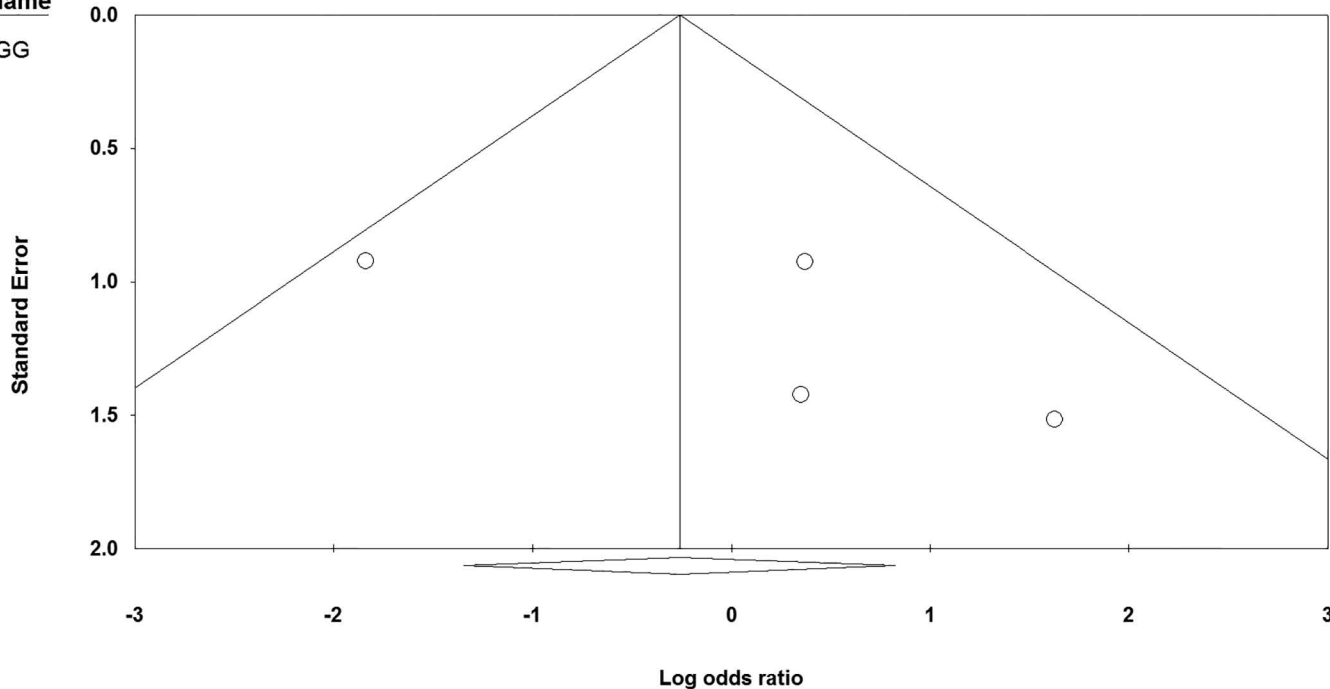

Study name

GA vs. GG

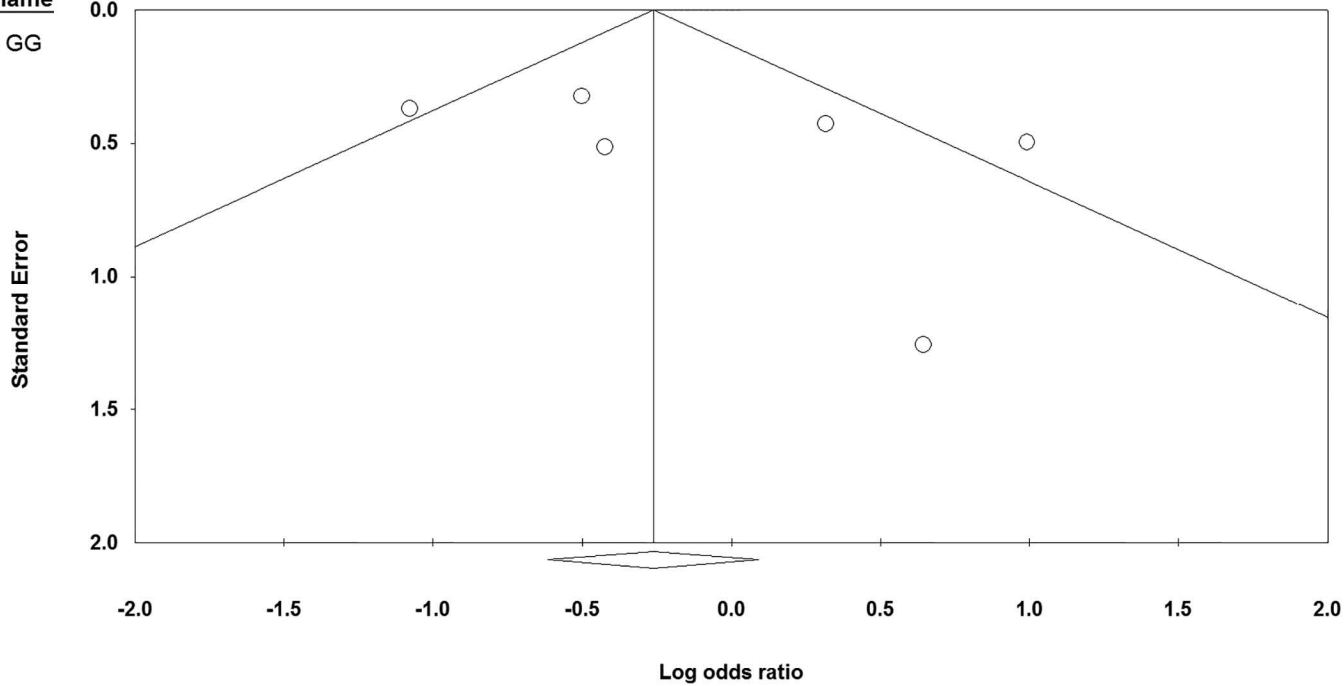

Study name

AA+GA vs. GG

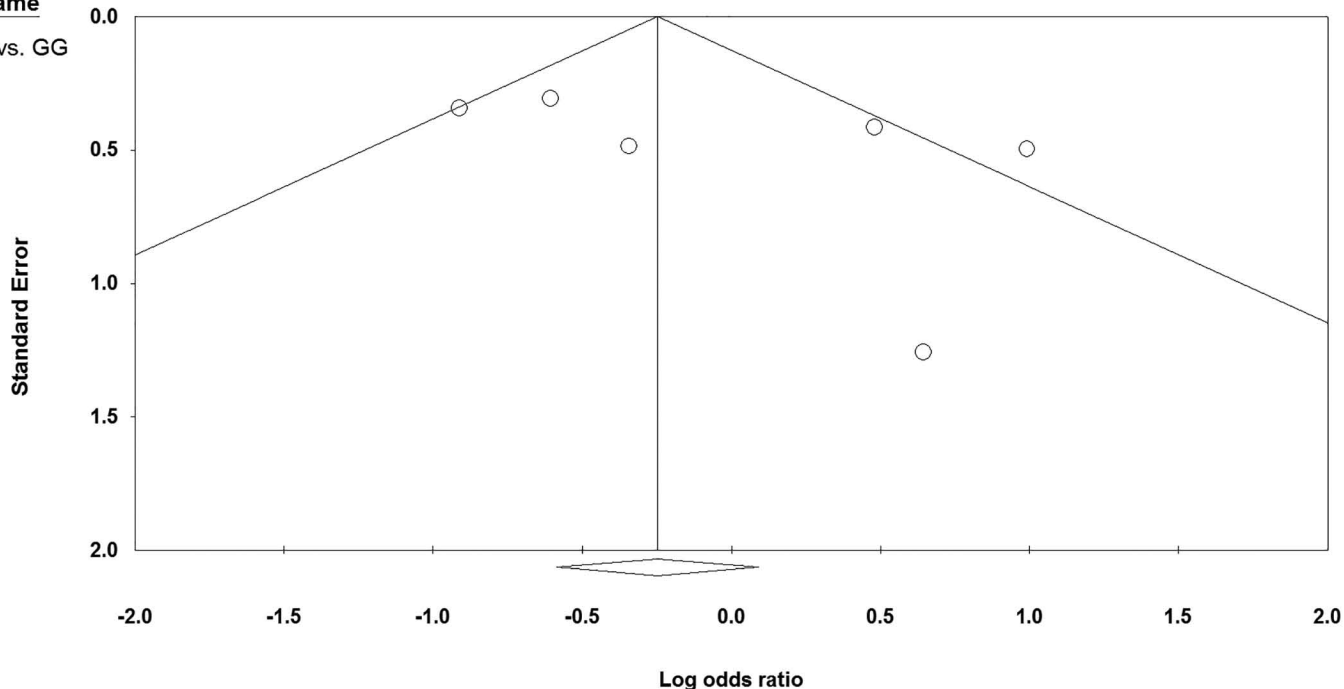

Study name

AA vs. GG+GA

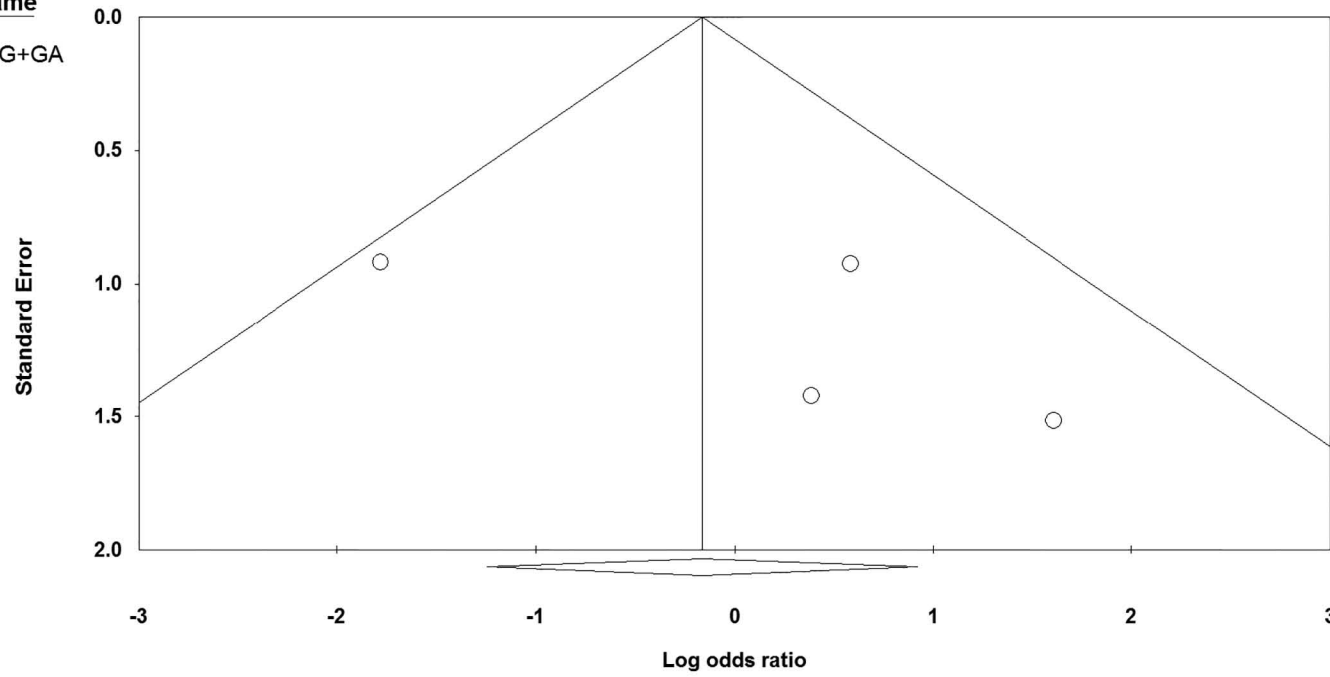

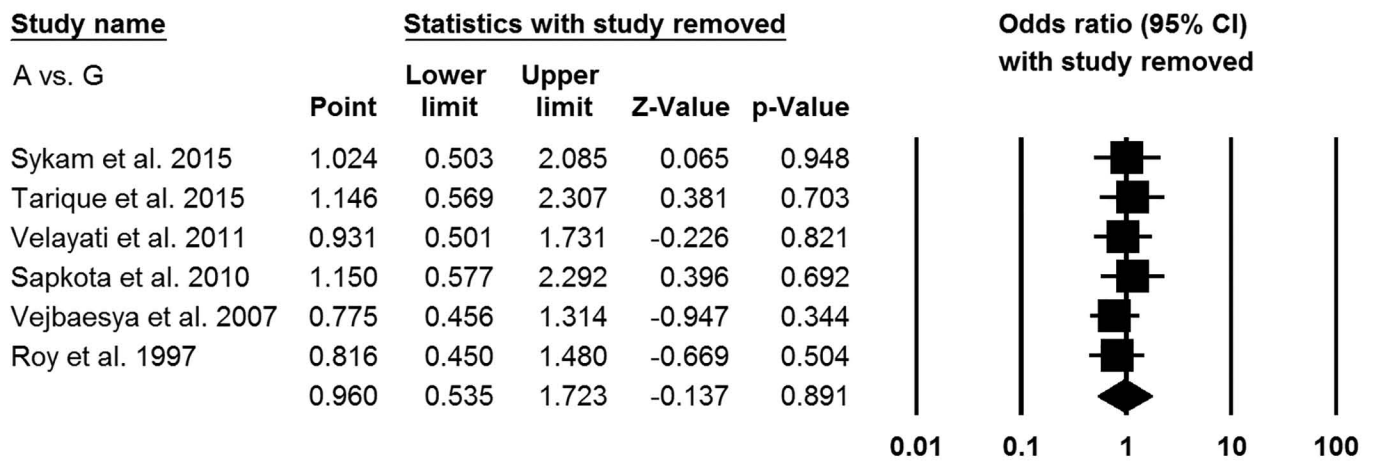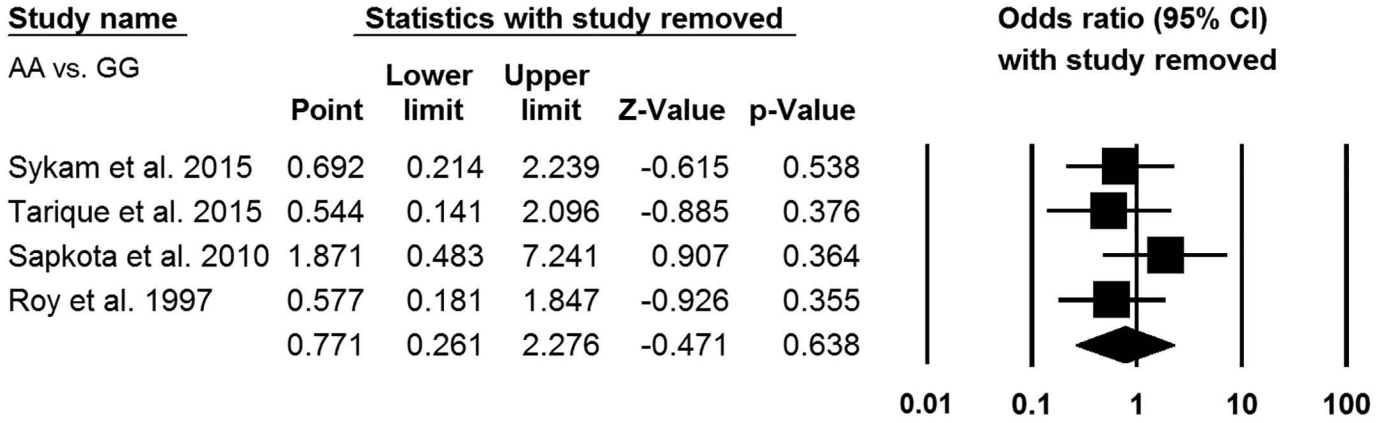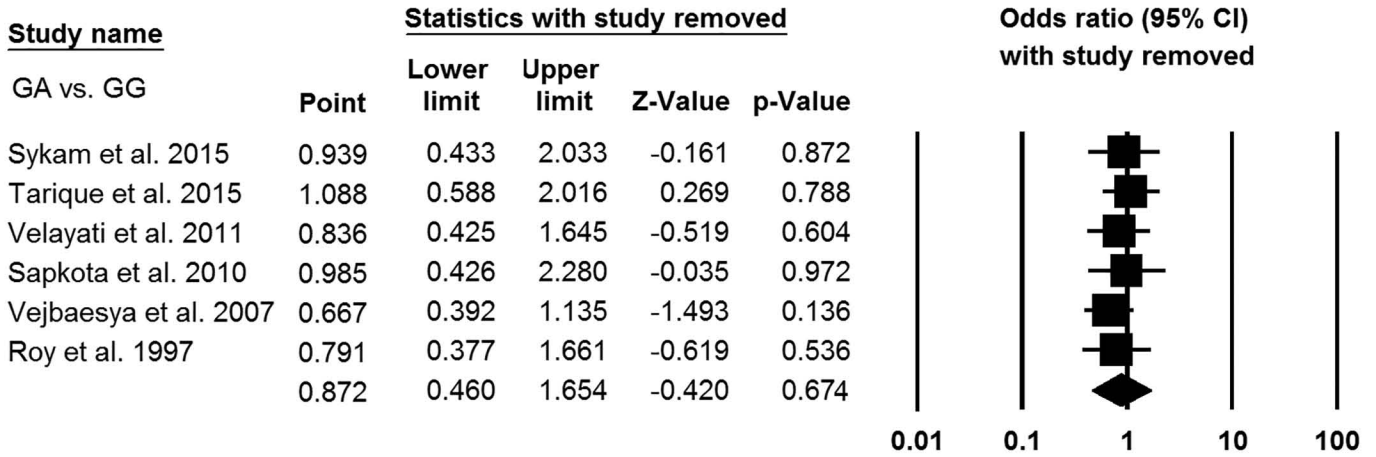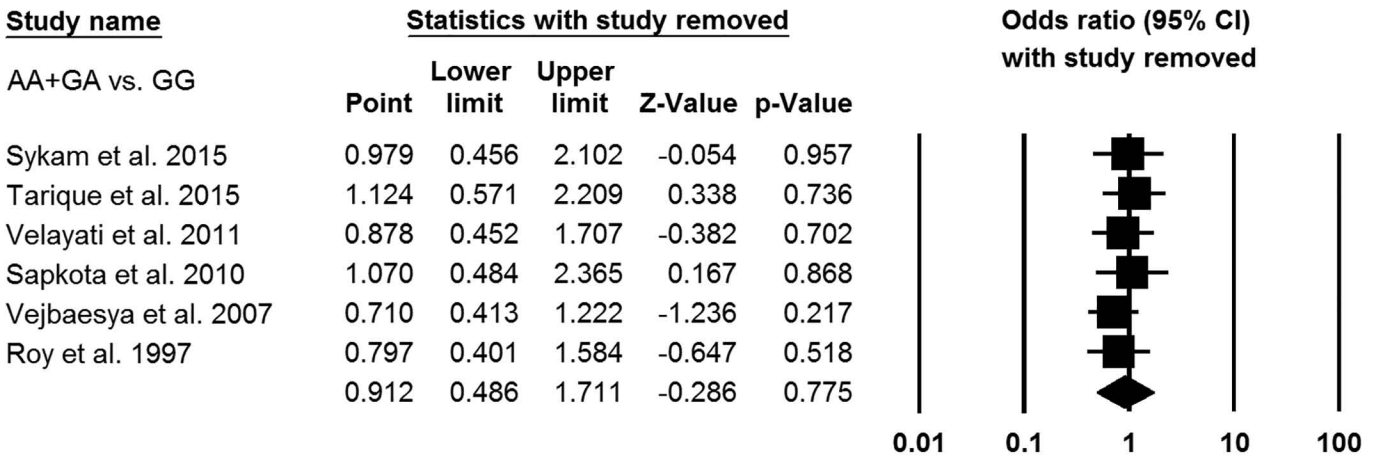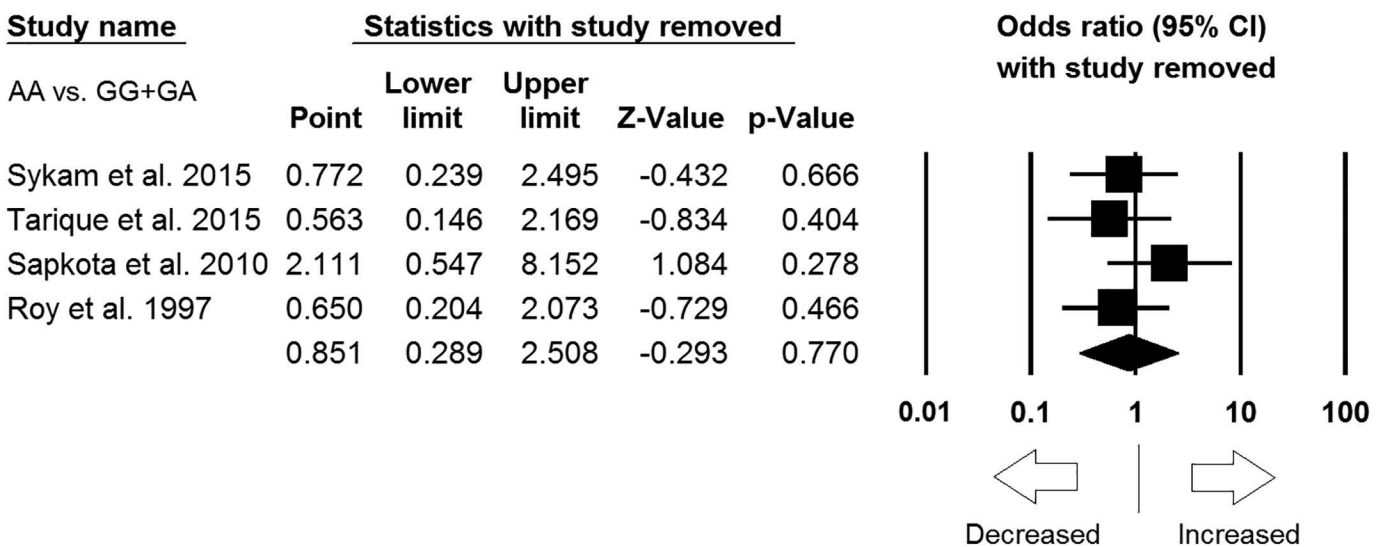

Funnel Plot of Standard Error by Log odds ratio

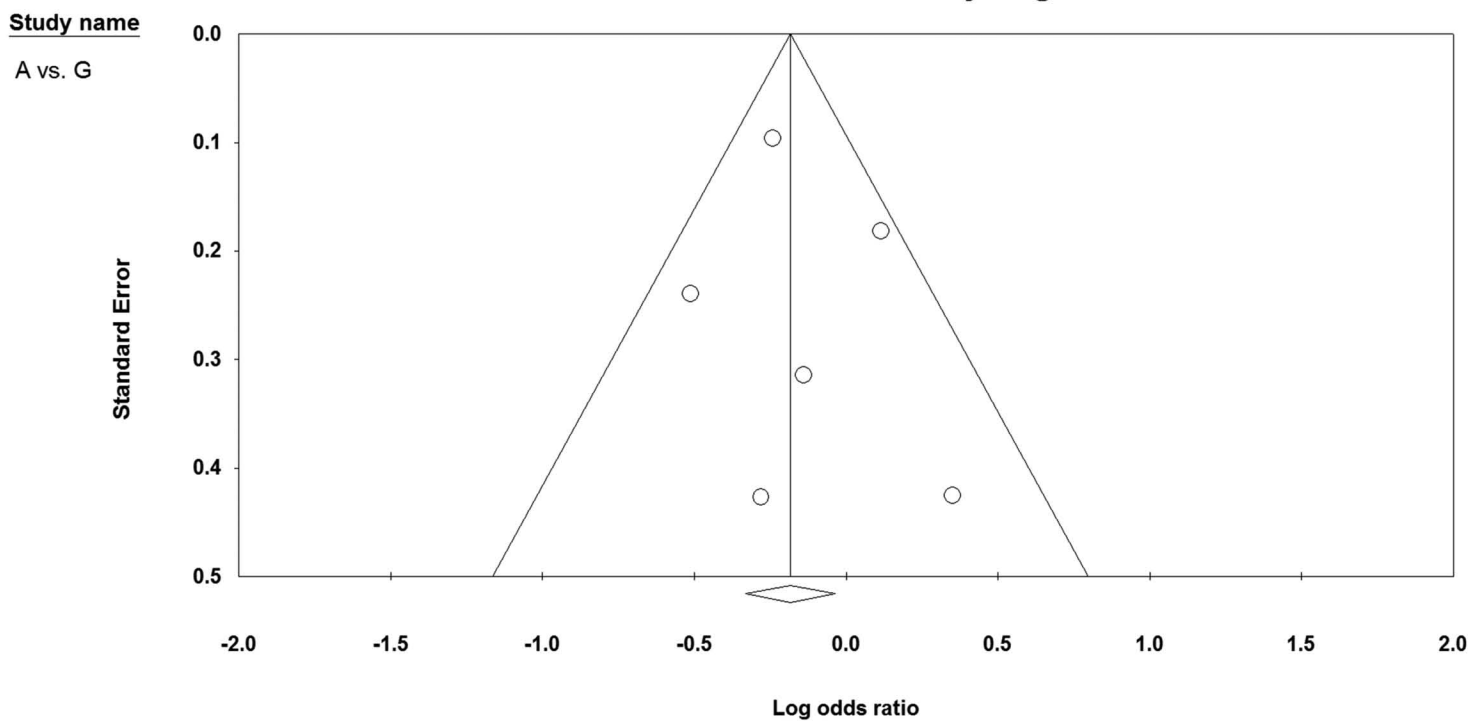

Funnel Plot of Standard Error by Log odds ratio

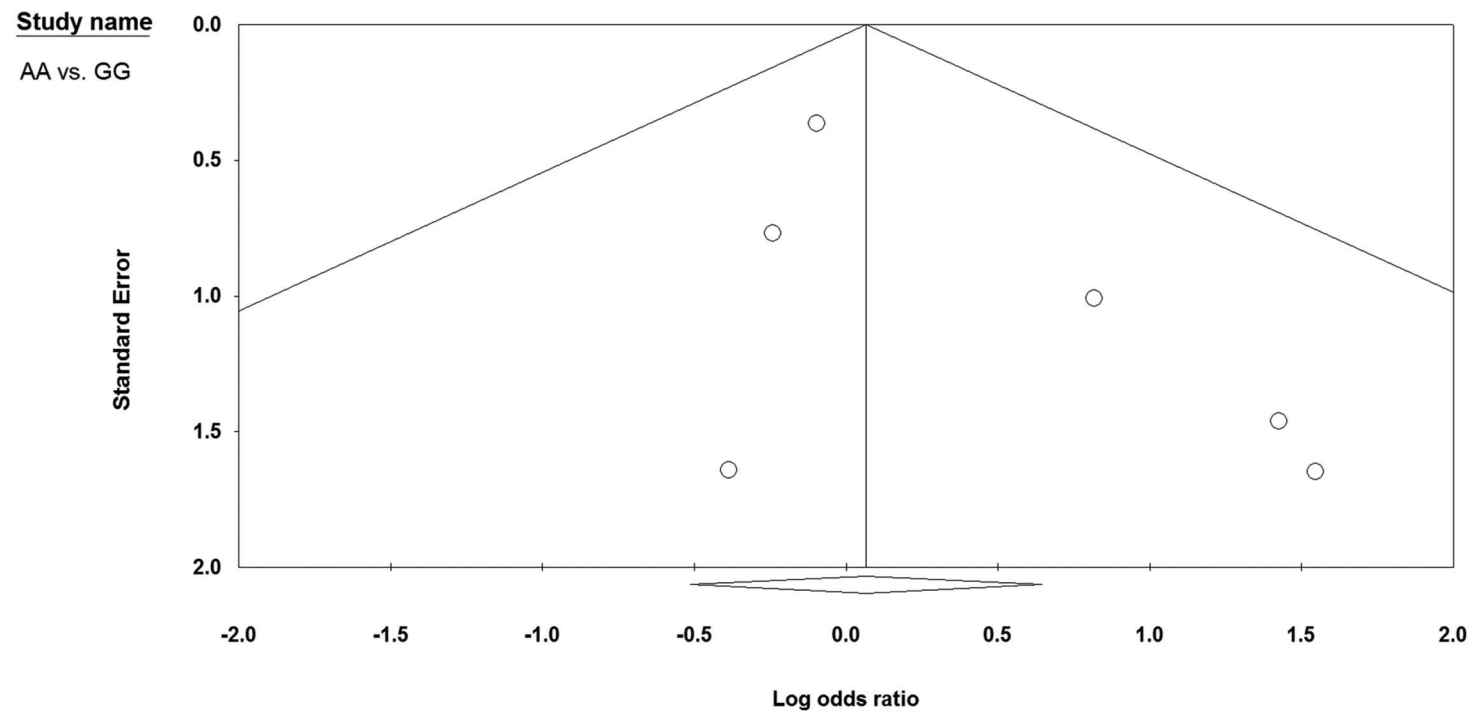

Funnel Plot of Standard Error by Log odds ratio

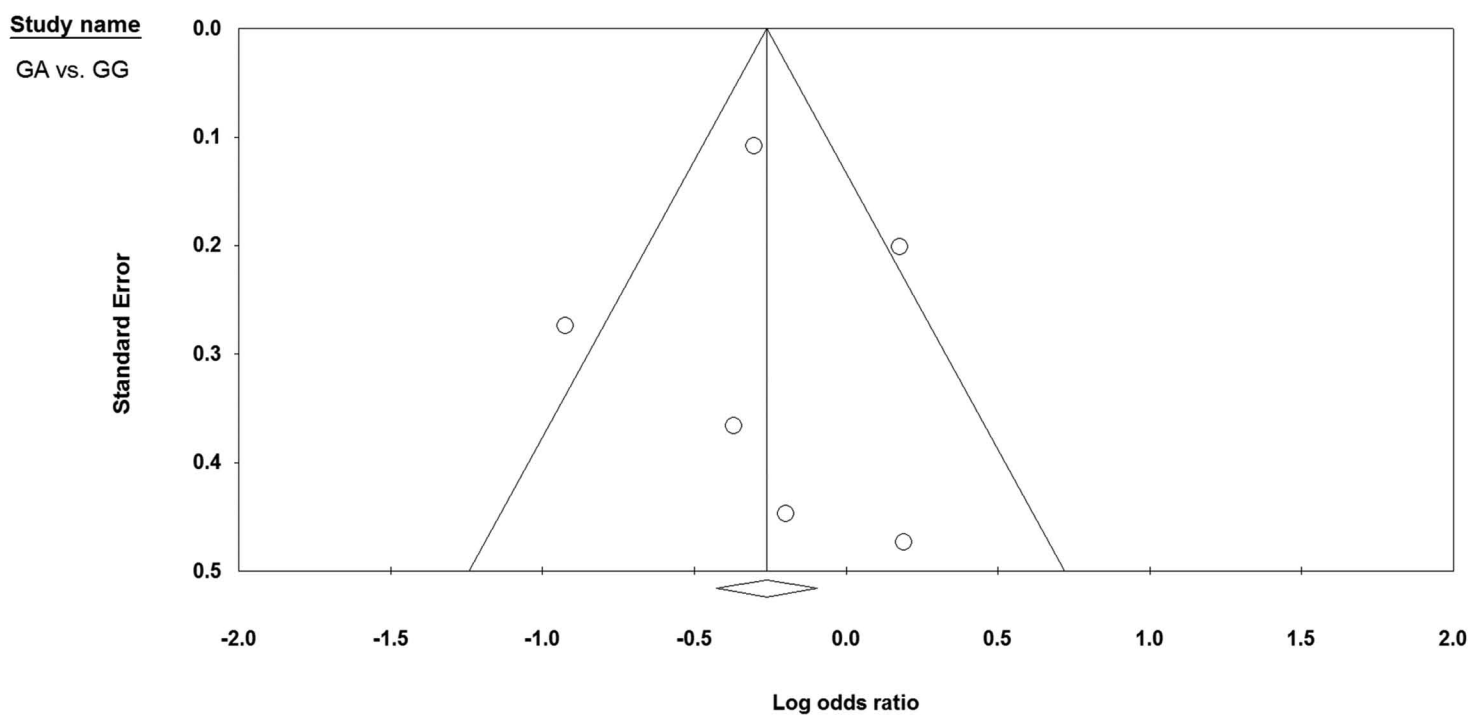

Funnel Plot of Standard Error by Log odds ratio

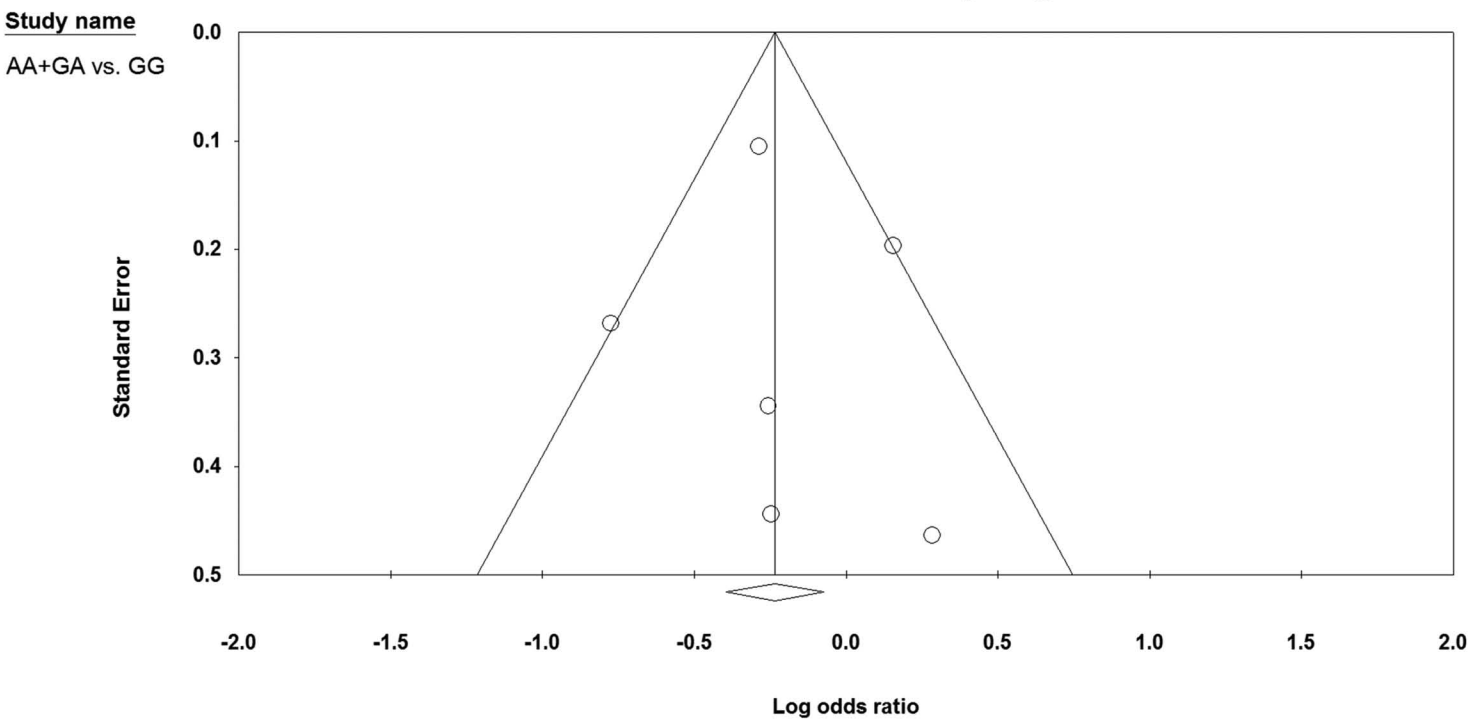

Funnel Plot of Standard Error by Log odds ratio

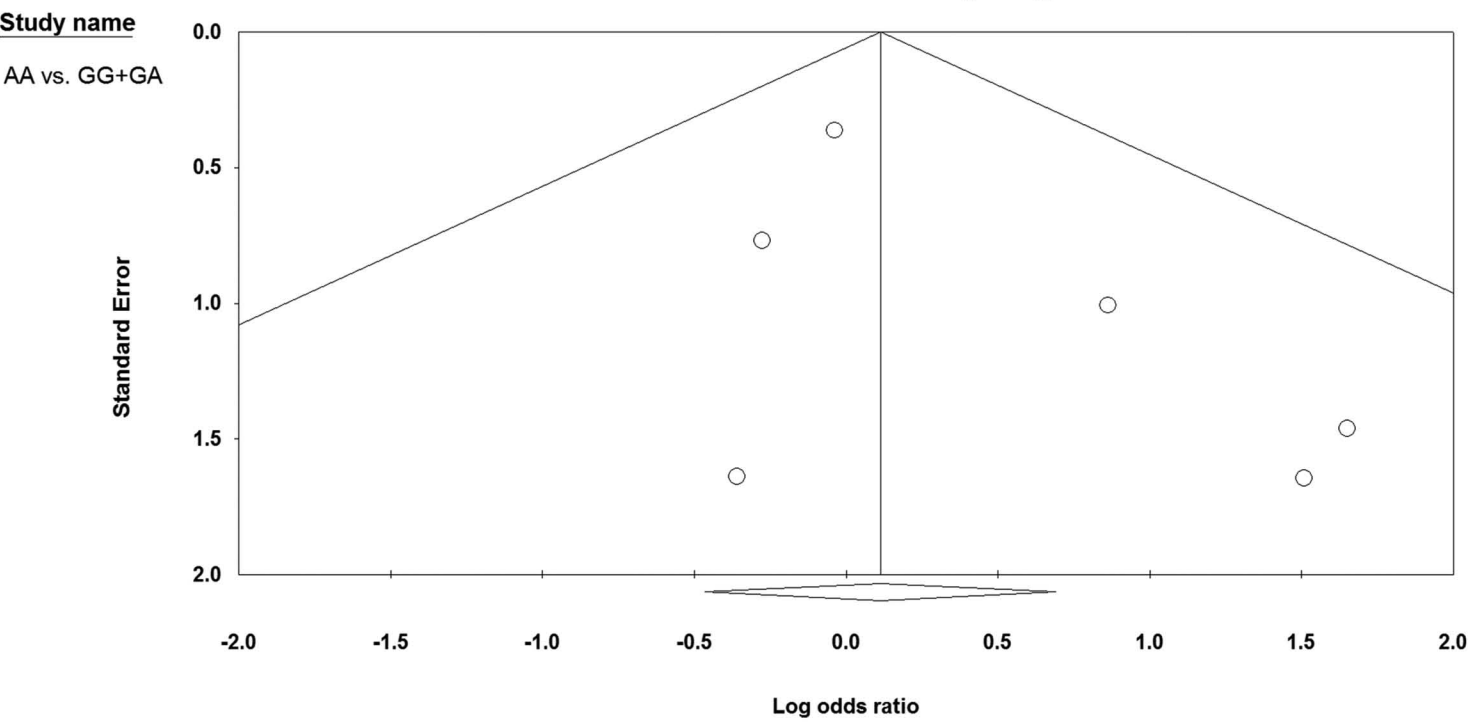

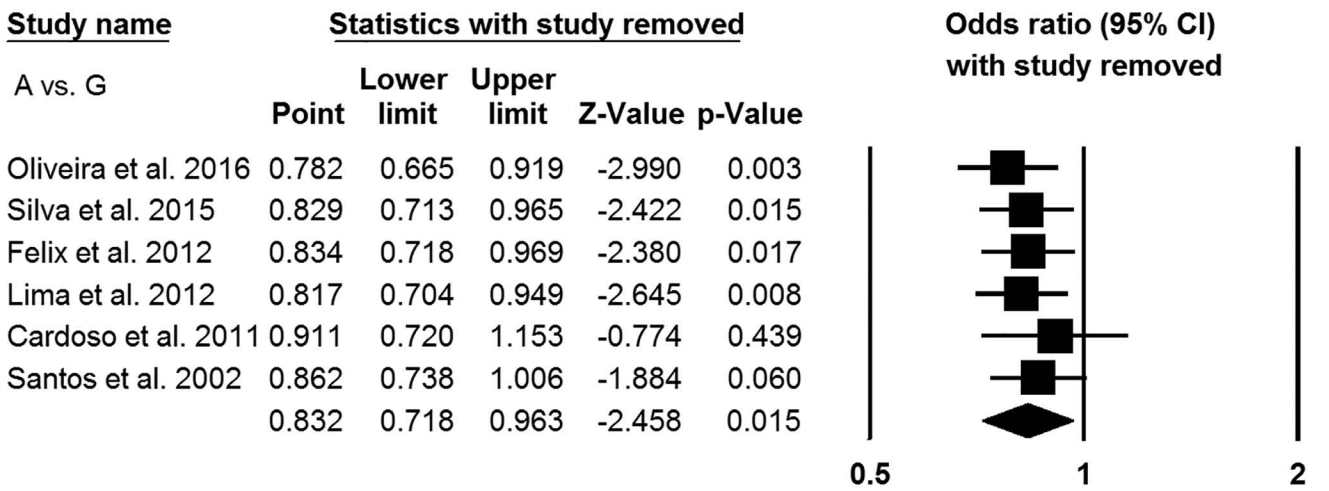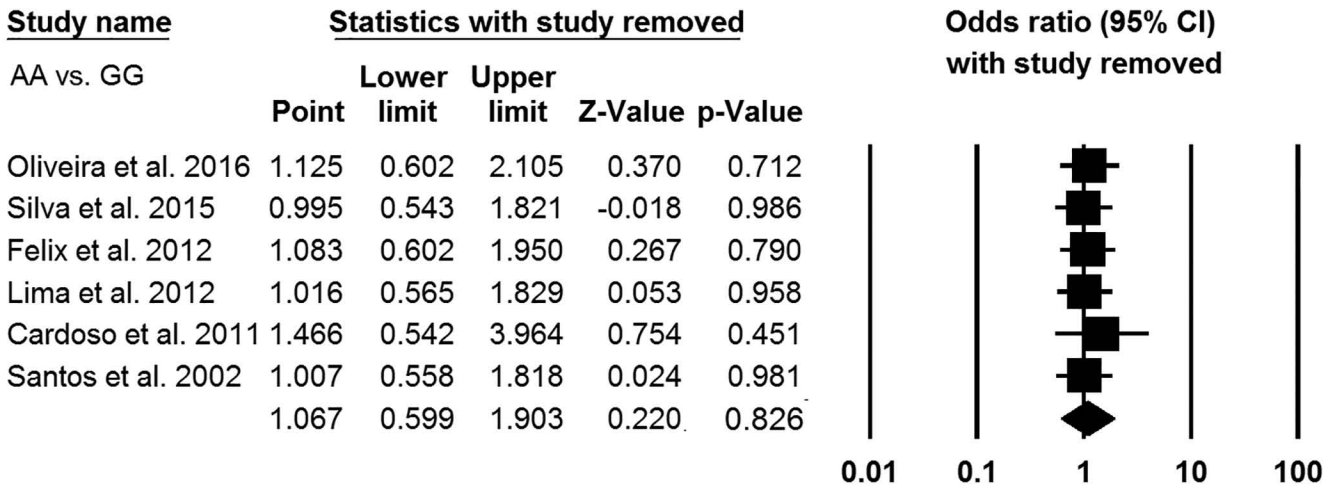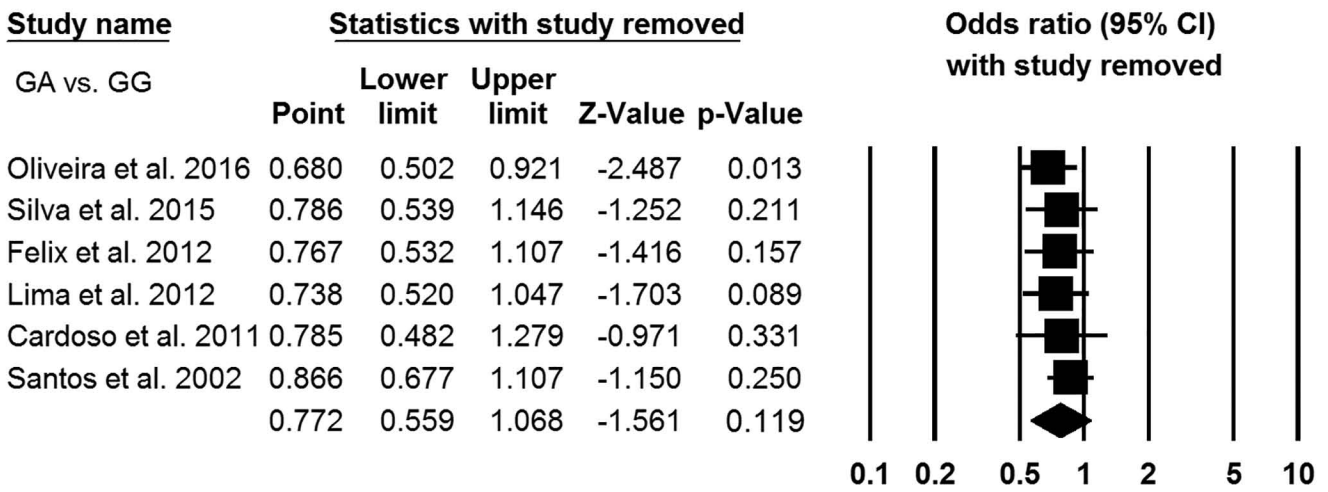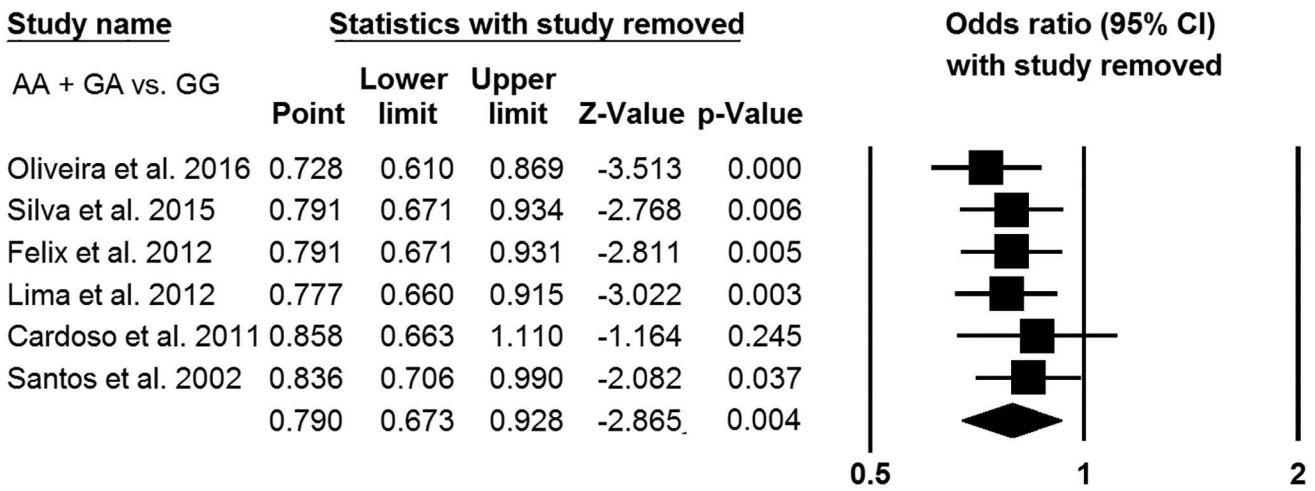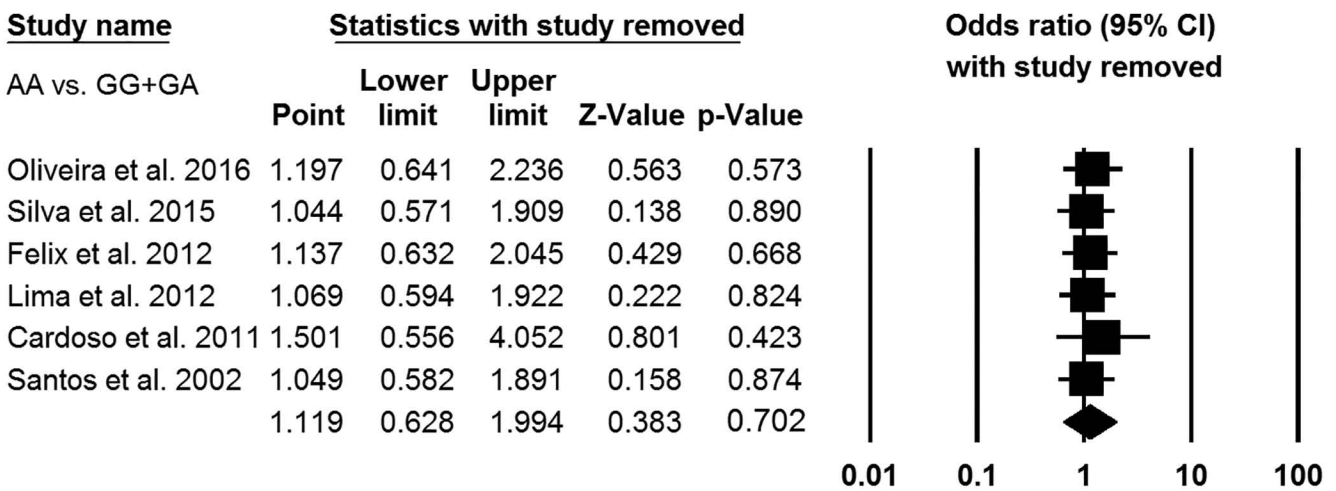


  
 Decreased      Increased
